# Supplementary material
Source: publisher site journal article supplement (https://www.spandidos-publications.com/6576/downloadSupplementary)
Supplement: Supplementary file 1 [file downloadSupplementary]

Table SI. Demographic and clinicopathological characteristics of patients whose samples were evaluated by immunohistochemical analysis (n=149).

| Parameter                  | Value        |
|----------------------------|--------------|
| Sex                        |              |
| Male                       | 67 (45.0)    |
| Female                     | 82 (55.0)    |
| Age, years                 | 66.9±9.1(43- |
| Smoking status             |              |
| Non-smoker                 | 84 (56.3)    |
| Smoker                     | 65 (43.7)    |
| Brinkman index (mean)      | 357.7        |
| Pathology                  |              |
| Lepidic                    | 52 (35.0)    |
| Papillary                  | 61 (41.0)    |
| Solid                      | 6 (4.0)      |
| Acinar                     | 8 (5.3)      |
| Mix or others              | 22 (14.7)    |
| Operation                  |              |
| Pneumonectomy              | 1 (0.7)      |
| Lobectomy                  | 141 (94.6)   |
| Segmentectomy              | 3 (2.0)      |
| Lobectomy+segmentectomy    | 4 (2.7)      |
| Complete resection         | 148          |
| Partial resection          | 1            |
| Preoperative chemotherapy  | 4 (2.7)      |
| Postoperative chemotherapy | 44 (29.5)    |
| Cisplatin-based            | 6 (4.0)      |
| UFT                        | 24 (16.1)    |
| Other                      | 14 (9.4)     |
| Pathological stage         |              |
| IA                         | 82 (55.0)    |
| IB                         | 36 (24.3)    |
| IIA                        | 13 (8.7)     |
| IIB                        | 5 (3.3)      |
| III                        | 13 (8.7)     |
| pN factor                  |              |
| 0                          | 127 (85.2)   |
| 1                          | 10 (6.8)     |
| 2                          | 12 (8.0)     |
| PI factor positive         | 31 (20.0)    |
| V factor positive (n=143)  | 24 (16.7)    |
| Ly factor positive (n=147) | 29 (19.7)    |
| EGFR mutation (n=61)       | 30 (49.1)    |

The sample numbers are displayed for characteristics with incomplete data (e.g. n=143). Values are expressed as n (%) or the mean ± standard deviation and range. <sup>a</sup>The Brinkman index is the number of cigarettes smoked per day multiplied by the number of years of smoking. <sup>b</sup>Stage according to the 7th edition of the tumor-nodes-metastasis classification (25). UFT, tegafur/uracil; PI, pleural; V, vascular; Ly, lymph node; EGFR, epidermal growth factor receptor.
